# Supplementary material for: Porous ZnO–ZnSe nanocomposites for visible light photocatalysis
Source: Royal Society of Chemistry journal article supplement (doi:10.1039/c2nr11869f), 2012-01-01
Supplement: c2nr11869f.pdf [file c2nr11869f.pdf]

## Electronic Supplementary Information (ESI)

### Porous ZnO-ZnSe nanocomposites for visible light photocatalysis

Seungho Cho, Ji-Wook Jang, Jae Sung Lee\* and Kun-Hong Lee\*

Department of Chemical Engineering, Pohang University of Science and Technology (POSTECH), San 31, Hyoja-Dong, Nam-Gu, Pohang, Gyungbuk, Korea, 790-784

\*Corresponding author: E-mail: [jlee@postech.ac.kr](mailto:jlee@postech.ac.kr) (J.S.L.); [ce20047@postech.ac.kr](mailto:ce20047@postech.ac.kr) (K.-H.L.)

#### ZnO-ZnSe (core-shell) structures

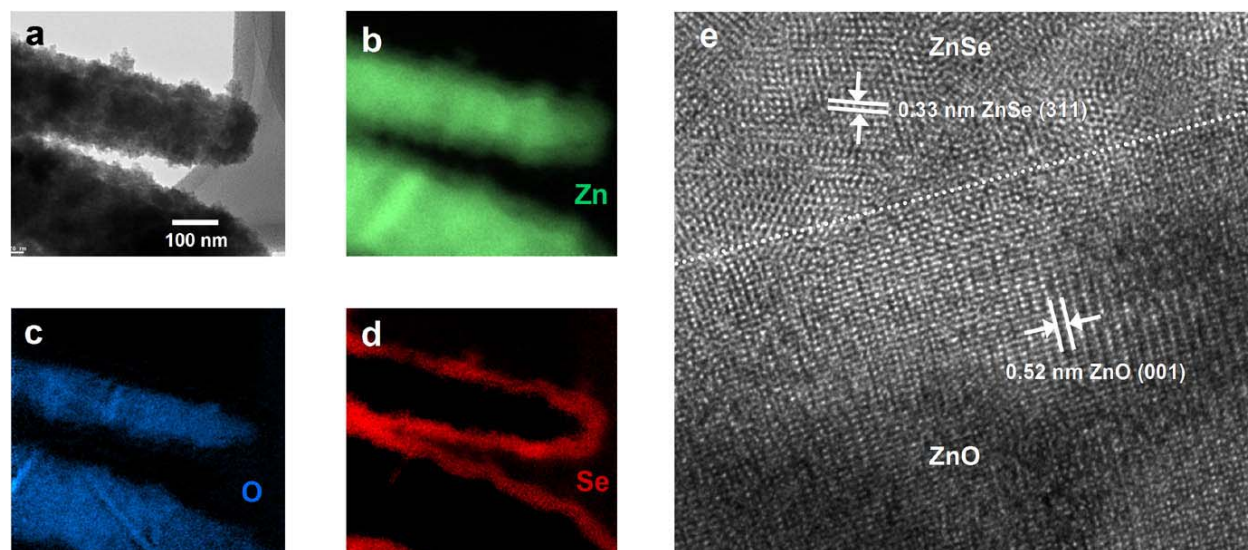

**Figure S1.** (a) TEM image of ZnO/ZnSe (core/shell) structures. ZnO nanorods were used as precursors. EELS elemental mapping of the building blocks: (b) Zn, (c) O, and (d) Se. (e) HR-TEM image of a ZnO/ZnSe (core/shell) structure.

### Photocatalytic H<sub>2</sub> evolution tests

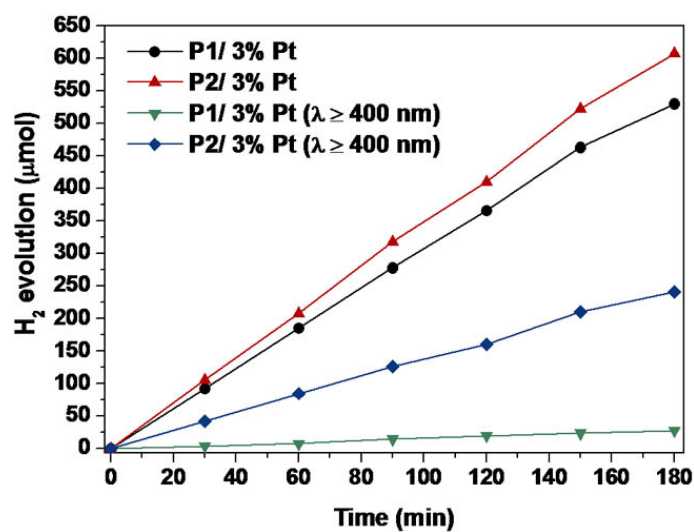

**Figure S2.** Photocatalytic activities for H<sub>2</sub> evolution. Experimental conditions: 3% Pt-loaded P1 (50 mg), 3% Pt-loaded P2 (50 mg) 100 mL aqueous solution containing 0.25 M Na<sub>2</sub>S and 0.35 M Na<sub>2</sub>SO<sub>3</sub>; light source: Hg lamp (500 W).
